# Supplementary material for: Tailoring ultra-fast charge transfer in MoS2
Source: Royal Society of Chemistry journal article supplement (doi:10.1039/d0cp00857e), 2020-01-01
Supplement: d0cp00857e1.pdf [file d0cp00857e1.pdf]

# Supplementary Information: Tailoring Ultra-fast Charge Transfer in MoS<sub>2</sub>

Fredrik O.L. Johansson,<sup>\*a</sup> Ute B. Cappel,<sup>b</sup> Mattis Fondell,<sup>c</sup> Yuanyuan Han,<sup>d</sup> Mihaela Gorgoi,<sup>e</sup> Klaus Leifer,<sup>d</sup> and Andreas Lindblad<sup>a</sup>

## 1 Characterisation of MoS<sub>2</sub>

XRD was recorded with CuK $\alpha$  radiation ( $\hbar\omega = 8048$  eV,  $\lambda = 1.54$  Å) with a Bruker TWIN-TWIN instrument. The Raman measurements were acquired using a Renishaw micro Raman system with a 532 nm argon-ion laser.

The left panel in Fig. 1 shows a general view of the morphology of the rGO-doped MoS<sub>2</sub> and reveals a uniform sheet-structure. The sheet-structures also indicates a large surface area. The image also indicates that the individual sheets are very thin.

The XRD spectra in Fig. 1 indicates that the MoS<sub>2</sub> in the rGO-doped sample is crystalline. The broad peaks indicate a small crystallite size of the MoS<sub>2</sub> in the sample *i.e.* the MoS<sub>2</sub> is layered very thin or poly-crystalline on the rGO sheets. Raman-spectroscopy shows that the rGO-doped MoS<sub>2</sub> consists of pure MoS<sub>2</sub> and reduced graphene oxide, as can be seen in Fig. 1. The Raman spectra of the doped material shows the characteristic  $E_{2g}^1$  and  $A_{1g}$  peaks of the in and out of plane vibrations from MoS<sub>2</sub>, with a peak split of  $\approx 26.4$  cm<sup>-1</sup> indicates that the MoS<sub>2</sub> is bulk-like<sup>1</sup>. The characteristic D and G peaks of graphene oxide are also present, with a higher intensity of the G peak compared to the D peak.

As can be seen in Figure 2 and Fig. 4 there is one component of molybdenum and one of sulphur, in all three samples. This indicates high phase-purity of both systems. The shoulder on the high binding energy side of the Mo 3p peaks and the broad background under the  $3p_{1/2}$  component are attributed to bulk and surface plasmons<sup>2</sup>. Fig. 3 shows the results from a least squares fit of the C 1s spectra from the reduced graphene oxide, Fig. 4 shows the O 1s spectra. The O 1s result is similar to that of reduced graphene oxide from reference 3, there is however a shift to higher binding energies compared to their results, these could be from the addition of MoS<sub>2</sub>. Shifts in the O 1s binding energy as function of reduction is also reported elsewhere<sup>4</sup>. The O 1s spectrum in Figure 4 together with C 1s indicates reduced graphene oxide since neither S 1s nor Mo 3p show any oxide contribution.

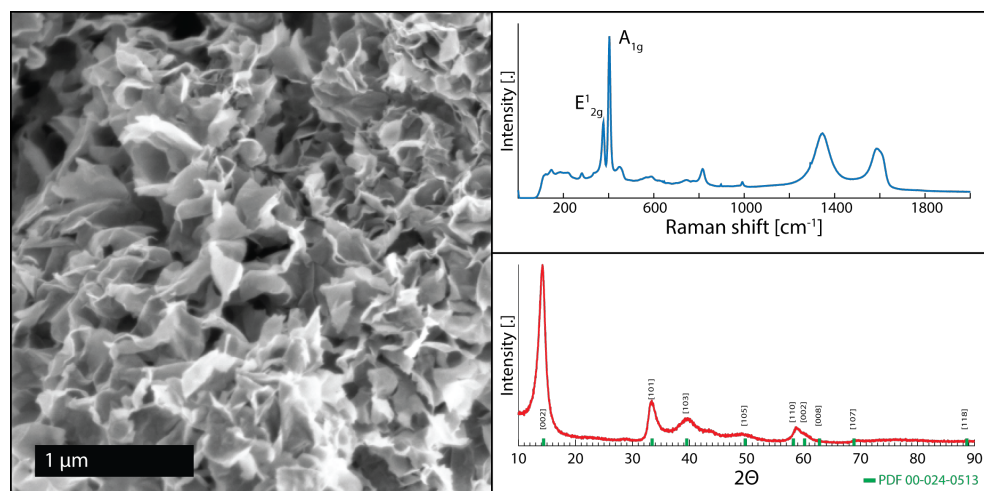

**Fig. 1** Left; SEM image of the rGO-doped MoS<sub>2</sub> top right; Raman spectra acquired using a 532 nm laser at 2 mW bottom right; XRD spectra of the rGO-doped MoS<sub>2</sub>.

<sup>a</sup> Division Molecular and Condensed Matter Physics, Department Physics and Astronomy, Uppsala University, Box 516, SE-75221 Uppsala, Sweden.

<sup>b</sup> Div. of Applied Physical Chemistry, Department of Chemistry, KTH Royal Institute of Technology, SE-100 44 Stockholm, Sweden.

<sup>c</sup> Institute for Methods and Instrumentation for Synchrotron Radiation Research, Helmholtz-Zentrum Berlin für Materialien und Energie, Albert-Einstein-Str. 15, 12489 Berlin, Germany.

<sup>d</sup> Electron Microscopy and Nanoengineering, Department of Engineering Sciences, Uppsala University, Box 534, SE-751 21 Uppsala, Sweden.

<sup>e</sup> EMIL laboratory, Helmholtz-Zentrum Berlin für Materialien und Energie, Albert-Einstein-Str. 15, 12489 Berlin, Germany.

\* fredrik.johansson@physics.uu.se

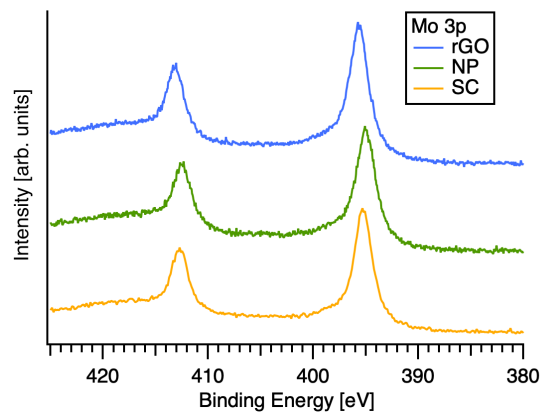

**Fig. 2** Mo 3p spectra recorded at a photon energy of 2005 eV for the three different samples.

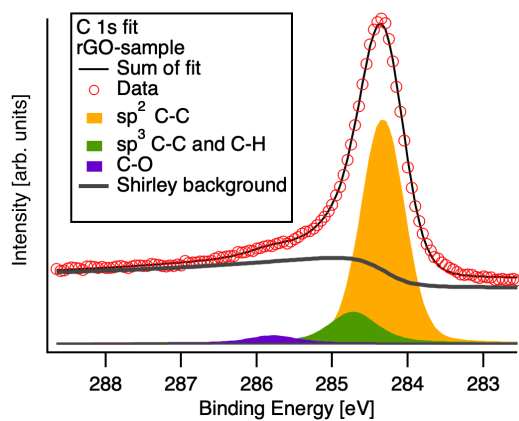

**Fig. 3** Least square fit of the C 1s photoline for the rGO sample recorded at 2005 eV photon energy.

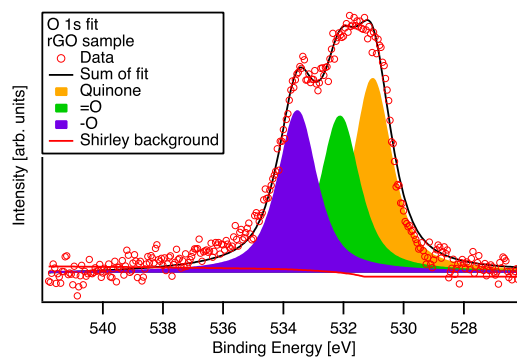

**Fig. 4** Least square fit of the O 1s spectra recorded at a photon energy of 2005 eV for the rGO sample.

## 2 The life time width: S 1s

The finite life time of the core ionised state is reflected in a Lorentzian broadening of the spectral profile.

The S 1s X-ray photoelectron spectra were taken at a photon energy of 6015 eV, far above the ionisation threshold. The binding energy scale were calibrated against the Au 4f<sub>7/2</sub> binding energy. The combined experimental broadening from the monochromatic photon bandwidth and the electron energy analyser is modelled with a Gaussian.

The spectra were modelled with a least squares fit of a Voigt profile (combining the Lorentzian and Gaussian contributions to the spectral imprint) and a Shirley background function.

The relation between the Lorentzian width and the core-hole life time is given by Eq. 1.

## 3 Fitting of the Auger spectra

The Auger spectra were fitted using a least squares method from the SPANCF Igor package<sup>5</sup>. A Shirley type background<sup>6</sup>, asymmetric PCI-type for the charge transfer Auger line and Voigt line for the spectator Auger line. First the normal Auger spectra was fitted above the ionisation threshold to get a fixed energy position for the main peak. The individual spectra were then fitted from high photon energy towards lower photon energy using the kinetic energy position from the Normal Auger spectra and knowing the photon energy step the position of the Raman peak could be determined.

$$\tau_c = \frac{\hbar}{\Gamma} \quad (1)$$

The theoretical framework has been described by Ohno<sup>7</sup>.

## References

- 1 H. Li, Q. Zhang, C. C. R. Yap, B. K. Tay, T. H. T. Edwin, A. Olivier and D. Baillargeat, *Advanced Functional Materials*, 2012, **22**, 1385–1390.
- 2 D. Ganta, S. Sinha and R. T. Haasch, *Surface Science Spectra*, 2014, **21**, 19–27.
- 3 N. Díez, A. Śliwak, S. Gryglewicz, B. Grzyb and G. Gryglewicz, *RSC Advances*, 2015, **5**, 81831–81837.
- 4 D. Yang, A. Velamakanni, G. Bozoklu, S. Park, M. Stoller, R. D. Piner, S. Stankovich, I. Jung, D. A. Field, C. A. Ventrice Jr *et al.*, *Carbon*, 2009, **47**, 145–152.
- 5 *Spectrum Analysis by Curve Fitting (SPANCF) macro package for Igor Pro* by Edwin Kukk (edwin.kukk@utu.fi), University of Turku.
- 6 D. A. Shirley, *Physical Review B*, 1972, **5**, 4709.
- 7 M. Ohno, *Phys. Rev. B*, 1994, **50**, 2566–2575.
